# Supplementary material for: The maize Ga1-s allele confers protection against ga1 pollen in popcorn and dent corn
Source: PubMed Central journal article supplement (PMC9718820; doi:10.1038/s41598-022-25261-8), 2022-12-02
Supplement: 41598_2022_25261_MOESM1_ESM.pdf [file 41598_2022_25261_MOESM1_ESM.pdf]

Supplemental Figure 1. Example of each genotypic class and all four replicates.

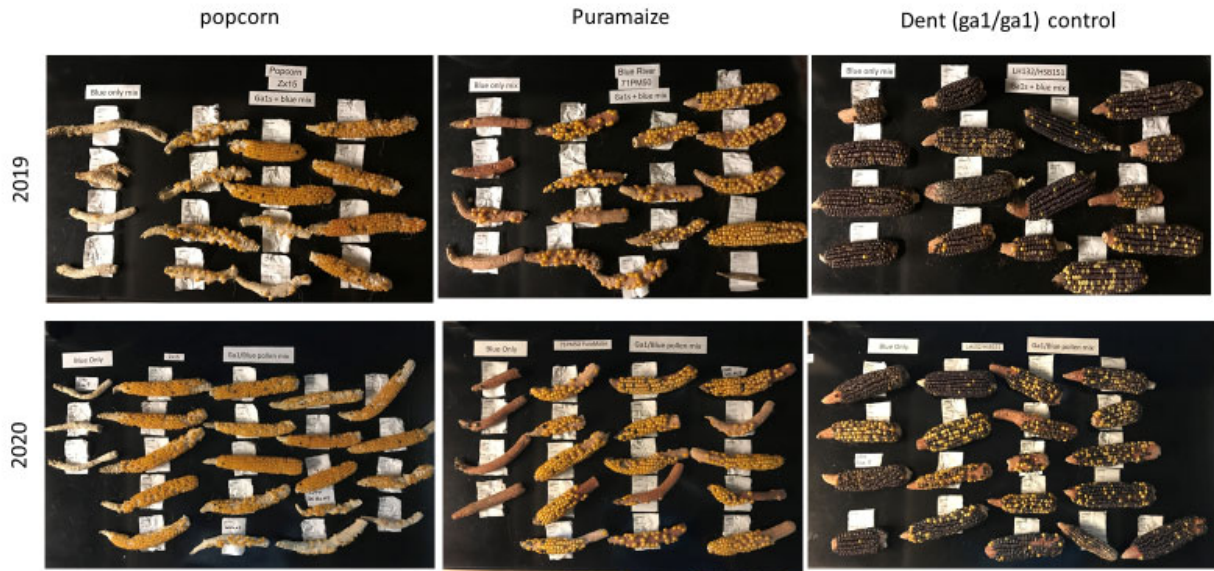

Supplemental Figure 2. Studentized residuals of pollen exclusion measurements plotted as a Normal Quantile Plots. The solid red lines indicate a normal distribution. Dashed Red lines indicate the 95% confidence interval for a normal distribution of the residuals.

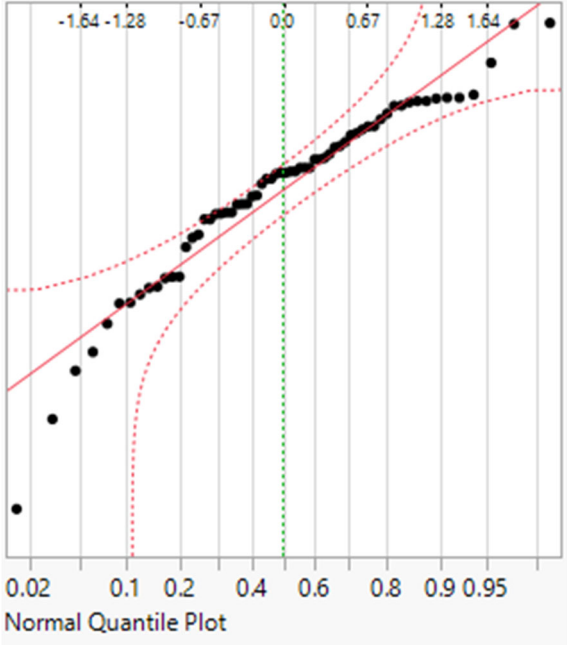

Supplemental Table 1. Individual ear ratings for pollen exclusion as described in Materials and Methods.

| Year | Loc Seq# | Rep | Class     | Pedigree             | Mix A | Mix B | Mix C | Mix D | Mix E | Mix F | Mix G | Mix H | Mix I | Mix average |
|------|----------|-----|-----------|----------------------|-------|-------|-------|-------|-------|-------|-------|-------|-------|-------------|
| 2019 | 1049     | 1   | popcorn   | 1H262                | 5     | 5     | 5     | 5     | 5     | 5     |       |       |       | 5           |
| 2019 | 1092     | 2   | popcorn   | 1H262                | 5     | 5     | 5     | 5     | 5     | 5     |       |       |       | 5           |
| 2020 | 2333     | 3   | popcorn   | 1H262                | 5     | 5     | 5     | 5     | 5     | 4     | 5     |       |       | 4.85714286  |
| 2020 | 2367     | 4   | popcorn   | 1H262                | 5     | 5     | 5     | 5     | 5     | 5     | 5     | 5     |       | 5           |
| 2019 | 1047     | 1   | popcorn   | 1H820                | 5     | 5     | 5     | 5     | 5     | 5     |       |       |       | 5           |
| 2019 | 1068     | 2   | popcorn   | 1H820                | 5     | 5     | 5     | 5     | 5     | 5     |       |       |       | 5           |
| 2020 | 2349     | 3   | popcorn   | 1H820                | 3     | 5     | 4     | 4     | 5     | 4     | 4     | 5     |       | 4.25        |
| 2020 | 2393     | 4   | popcorn   | 1H820                | 5     | 5     | 5     | 4     | 5     | 5     | 4     | 4     |       | 4.625       |
| 2019 | 1052     | 1   | PuraMaize | 54PM37 PuraMaize     | 1     | 2     | 2     | 4     | 4     | 2     |       |       |       | 2.5         |
| 2019 | 1089     | 2   | PuraMaize | 54PM37 PuraMaize     | 4     | 4     | 3     | 4     | 4     | 5     |       |       |       | 4           |
| 2020 | 2331     | 3   | PuraMaize | 54PM37 PuraMaize     | 5     | 5     | 5     | 5     | 3     | 3     | 4     | 5     |       | 4.375       |
| 2020 | 2369     | 4   | PuraMaize | 54PM37 PuraMaize     | 3     | 5     | 3     | 3     | 5     | 3     | 5     | 5     |       | 4           |
| 2019 | 1028     | 1   | PuraMaize | 58PM36 PuraMaize     | 5     | 5     | 4     | 4     | 5     | 5     |       |       |       | 4.66666667  |
| 2019 | 1069     | 2   | PuraMaize | 58PM36 PuraMaize     | 5     | 4     | 5     | 5     | 5     | 5     |       |       |       | 4.83333333  |
| 2020 | 2351     | 3   | PuraMaize | 58PM36 PuraMaize     | 5     | 5     | 3     | 4     | 4     | 5     | 5     | 5     |       | 4.5         |
| 2020 | 2374     | 4   | PuraMaize | 58PM36 PuraMaize     | 4     | 5     | 5     | 5     | 5     | 5     | 5     | 5     |       | 4.875       |
| 2019 | 1030     | 1   | PuraMaize | 66PM26 PuraMaize     | 1     | 4     | 4     | 4     | 5     | 3     |       |       |       | 3.5         |
| 2019 | 1071     | 2   | PuraMaize | 66PM26 PuraMaize     | 5     | 5     | 4     | 4     | 4     | 4     |       |       |       | 4.33333333  |
| 2020 | 2332     | 3   | PuraMaize | 66PM26 PuraMaize     | 5     | 2     | 5     | 5     | 5     | 5     | 4     |       |       | 4.42857143  |
| 2020 | 2390     | 4   | PuraMaize | 66PM26 PuraMaize     | 5     | 5     | 5     | 5     | 5     | 4     | 4     | 5     | 4     | 4.66666667  |
| 2019 | 1054     | 1   | PuraMaize | 71PM50 PuraMaize     | 5     | 5     | 5     | 5     | 5     | 5     | 5     |       |       | 5           |
| 2019 | 1091     | 2   | PuraMaize | 71PM50 PuraMaize     | 5     | 5     | 5     | 5     | 5     | 5     |       |       |       | 5           |
| 2020 | 2354     | 3   | PuraMaize | 71PM50 PuraMaize     | 5     | 5     | 5     | 4     | 5     | 4     | 5     | 5     |       | 4.75        |
| 2020 | 2368     | 4   | PuraMaize | 71PM50 PuraMaize     | 5     | 5     | 5     | 4     | 4     | 5     | 5     |       |       | 4.71428571  |
| 2019 | 1034     | 1   | dent      | B104 x CLRQ 00502/B1 | 2     | 2     | 3     | 1     | 2     | 2     | 3     |       |       | 2           |
| 2019 | 1070     | 2   | dent      | B104 x CLRQ 00502/B1 | 2     | 2     | 3     | 2     | 3     | 2     |       |       |       | 2.33333333  |
| 2020 | 2352     | 3   | dent      | B104 x CLRQ 00502/B1 | 3     | 3     | 3     | 4     | 3     | 3     | 2     | 2     | 2     | 2.875       |
| 2020 | 2392     | 4   | dent      | B104 x CLRQ 00502/B1 | 3     | 4     | 4     | 3     | 3     | 3     | 2     | 3     |       | 3.125       |
| 2019 | 1053     | 1   | dent      | B73/Mo17             | 2     | 2     | 1     | 1     | 1     | 1     |       |       |       | 1.33333333  |
| 2019 | 1067     | 2   | dent      | B73/Mo17             | 1     | 1     | 1     | 1     | 1     | 2     |       |       |       | 1.16666667  |
| 2020 | 2328     | 3   | dent      | B73/Mo17             | 1     | 1     | 1     | 1     | 1     | 1     | 1     | 1     | 1     | 1           |
| 2020 | 2387     | 4   | dent      | B73/Mo17             | 2     | 3     | 1     | 1     | 1     | 1     | 1     | 1     | 1     | 1.33333333  |
| 2019 | 1051     | 1   | dent      | BS13(S)C8)/OH 514    | 2     | 1     | 2     | 1     | 1     | 1     |       |       |       | 1.33333333  |
| 2019 | 1093     | 2   | dent      | BS13(S)C8)/OH 514    | 1     | 1     | 1     | 2     | 1     | 2     |       |       |       | 1.33333333  |
| 2020 | 2350     | 3   | dent      | BS13(S)C8)/OH 514    | 2     | 2     | 1     | 1     | 1     | 2     | 1     | 1     |       | 1.375       |
| 2020 | 2373     | 4   | dent      | BS13(S)C8)/OH 514    | 2     | 1     | 3     | 2     | 1     | 2     | 2     | 3     |       | 2           |
| 2019 | 1050     | 1   | PuraMaize | HPM603 PuraMaize     | 5     | 5     | 4     | 5     | 4     | 5     |       |       |       | 4.66666667  |
| 2019 | 1087     | 2   | PuraMaize | HPM603 PuraMaize     | 5     | 3     | 4     | 5     | 4     | 3     |       |       |       | 4           |
| 2020 | 2329     | 3   | PuraMaize | HPM603 PuraMaize     | 5     | 5     | 5     | 5     | 5     | 5     | 5     | 5     | 5     | 5           |
| 2020 | 2371     | 4   | PuraMaize | HPM603 PuraMaize     | 5     | 5     | 5     | 5     | 5     | 5     | 5     | 5     | 5     | 5           |
| 2019 | 1033     | 1   | dent      | LH132/HSB151         | 2     | 1     | 1     | 1     | 1     | 1     |       |       |       | 1.16666667  |
| 2019 | 1094     | 2   | dent      | LH132/HSB151         | 1     | 1     | 1     | 1     | 1     | 2     |       |       |       | 1.16666667  |
| 2020 | 2334     | 3   | dent      | LH132/HSB151         | 1     | 3     | 2     | 2     | 2     | 2     | 3     | 1     |       | 2           |
| 2020 | 2394     | 4   | dent      | LH132/HSB151         | 3     | 3     | 1     | 2     | 1     | 1     | 1     |       |       | 1.71428571  |
| 2019 | 1029     | 1   | PuraMaize | QM3922 PuraMaize     | 5     | 5     | 5     | 4     | 4     | 4     | 4     | 4     |       | 4.375       |
| 2019 | 1088     | 2   | PuraMaize | QM3922 PuraMaize     | 3     | 3     | 1     | 2     | 2     | 3     |       |       |       | 2.33333333  |
| 2020 | 2348     | 3   | PuraMaize | QM3922 PuraMaize     | 5     | 5     | 4     | 5     | 5     | 5     | 5     | 5     | 5     | 4.88888889  |
| 2020 | 2372     | 4   | PuraMaize | QM3922 PuraMaize     | 5     | 4     | 5     | 4     | 3     | 4     | 5     | 3     |       | 4.125       |
| 2019 | 1031     | 1   | popcorn   | Zx15                 | 5     | 5     | 5     | 5     | 5     | 5     |       |       |       | 5           |
| 2019 | 1090     | 2   | popcorn   | Zx15                 | 5     | 5     | 5     | 5     | 5     | 5     |       |       |       | 5           |
| 2020 | 2347     | 3   | popcorn   | Zx15                 | 5     | 5     | 5     | 5     | 5     | 5     | 5     | 5     |       | 5           |
| 2020 | 2370     | 4   | popcorn   | Zx15                 | 5     | 5     | 5     | 5     | 5     | 5     | 5     | 5     |       | 5           |
| 2019 | 1027     | 1   | popcorn   | Zx2                  | 5     | 4     | 5     | 5     | 5     | 5     |       |       |       | 4.83333333  |
| 2019 | 1073     | 2   | popcorn   | Zx2                  | 4     | 4     | 4     | 5     | 5     | 5     |       |       |       | 4.5         |
| 2020 | 2353     | 3   | popcorn   | Zx2                  | 5     | 5     | 5     | 5     | 5     | 5     | 5     | 5     |       | 5           |
| 2020 | 2389     | 4   | popcorn   | Zx2                  | 5     | 5     | 5     | 5     | 5     | 5     | 5     | 5     | 5     | 5           |
| 2019 | 1032     | 1   | popcorn   | Zx40                 | 5     | 5     | 4     | 5     | 5     | 4     | 5     |       |       | 4.66666667  |
| 2019 | 1074     | 2   | popcorn   | Zx40                 | 5     | 3     | 4     | 3     | 3     | 4     |       |       |       | 3.66666667  |
| 2020 | 2330     | 3   | popcorn   | Zx40                 | 5     | 5     | 5     | 5     | 5     | 5     | 5     | 5     | 5     | 5           |
| 2020 | 2391     | 4   | popcorn   | Zx40                 | 3     | 5     | 5     | 5     | 5     | 5     | 5     | 5     |       | 4.75        |
| 2019 | 1048     | 1   | popcorn   | Zx44                 | 5     | 3     | 2     | 5     | 3     | 3     |       |       |       | 3.5         |
| 2019 | 1072     | 2   | popcorn   | Zx44                 | 5     | 4     | 4     | 5     | 5     | 3     |       |       |       | 4.33333333  |
| 2020 | 2327     | 3   | popcorn   | Zx44                 | 3     | 5     | 5     | 5     | 4     | 5     | 5     | 5     | 5     | 4.66666667  |
| 2020 | 2388     | 4   | popcorn   | Zx44                 | 5     | 5     | 4     | 5     | 4     |       |       |       |       | 4.6         |
